# Supplementary material for: Hydrogen plasma reduced potassium titanate as a high power and ultralong lifespan anode material for sodium-ion batteries
Source: Royal Society of Chemistry journal article supplement (doi:10.1039/c8ta02523a), 2018-01-01
Supplement: c8ta02523a1.pdf [file c8ta02523a1.pdf]

## Hydrogen plasma reduced potassium titanate as a high power and long lifespan anode material for sodium-ion batteries

Ze Yang <sup>a, b, †</sup>, Jingying Sun <sup>a, b, †</sup>, Yunlong Xie <sup>c</sup>, Pawanjit Kaur <sup>a</sup>, Joseph Hernandez <sup>a</sup>,  
Yizhou Ni <sup>a, b</sup>, Lixin Xie <sup>a, b</sup>, Ying Yu <sup>c</sup>, Oomman K. Varghese <sup>a</sup>, Yunhui Huang <sup>d</sup>, and Shuo  
Chen <sup>a, b, \*</sup>

<sup>a</sup>*Department of Physics, University of Houston, Houston, Texas 77204*

<sup>b</sup>*Texas Center for Superconductivity at the University of Houston, Houston, Texas  
77204*

<sup>c</sup>*College of Physical Science and Technology, Central China Normal University, Wuhan,  
China 430079*

<sup>d</sup>*State Key Laboratory of Material Processing and Die & Mould Technology, School of  
Materials Science and Engineering, Huazhong University of Science and Technology,  
Wuhan, Hubei 430074, China*

<sup>†</sup>*The authors contributed equally.*

**Fig. S1** Crystal structure of zigzag layered  $A_2Ti_6O_{13}$  ( $A = Na, K$ ).

**Fig. S2** SEM images of KTO sample.

**Fig. S3** Electron diffraction pattern of B-KTO after one cycle.

**Fig. S4** Charge and discharge profile of KTO electrode at various C-rates.

**Fig. S5** (a) Charge and discharge profile of H-KTO electrode, and inset is pictures of H-KTO. (b) Rate capability of KTO, B-KTO and H-KTO.

**Fig. S6** XPS spectra for H-KTO samples.

**Fig. S7** Electrochemical impedance spectroscopy results of the KTO and B-KTO electrodes over the frequency range from 100 kHz to 0.1 Hz.

Table S1 Lattice parameter comparison of  $A_2Ti_6O_{13}$  (A = Na, K).

Table S2 High rate capacity comparison of B-KTO nanowires versus reported representative Ti-based anode materials in SIBs.

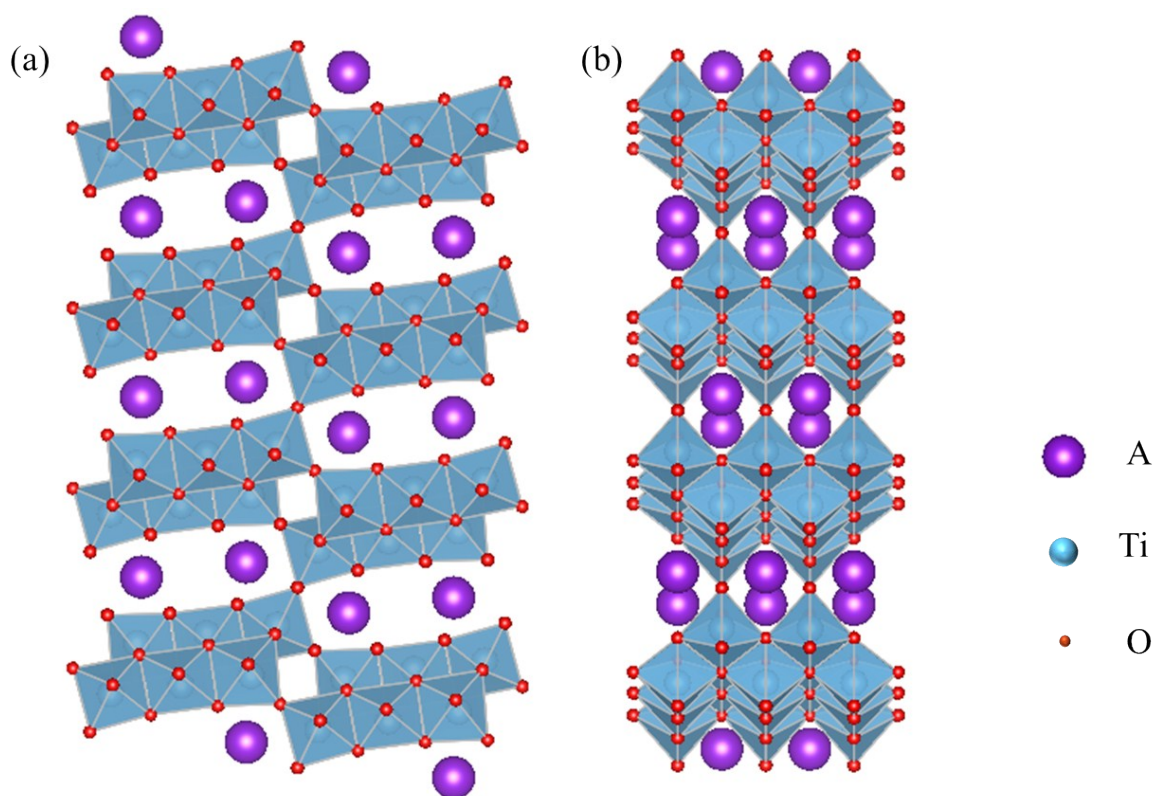

**Fig. S1** Crystal structure of zigzag layered  $A_2Ti_6O_{13}$  (A = Na, K).

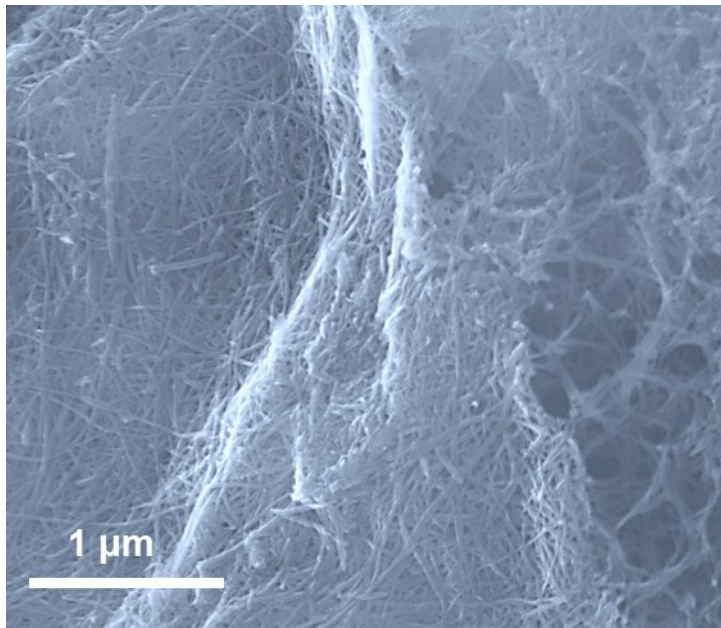

**Fig. S2** SEM images of KTO sample.

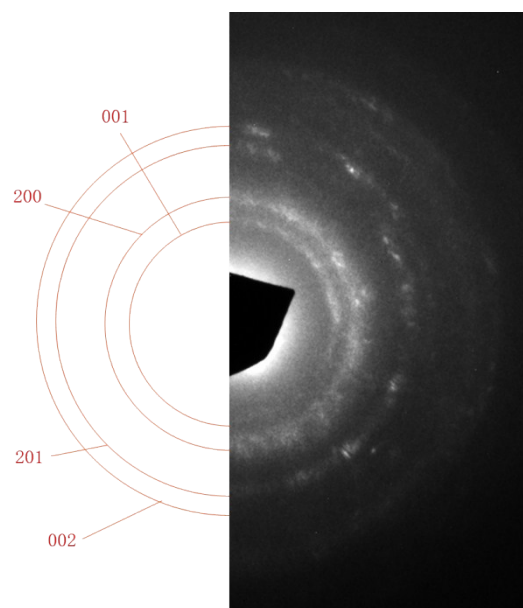

**Fig. S3** Electron diffraction pattern of B-KTO after the initial cycle.

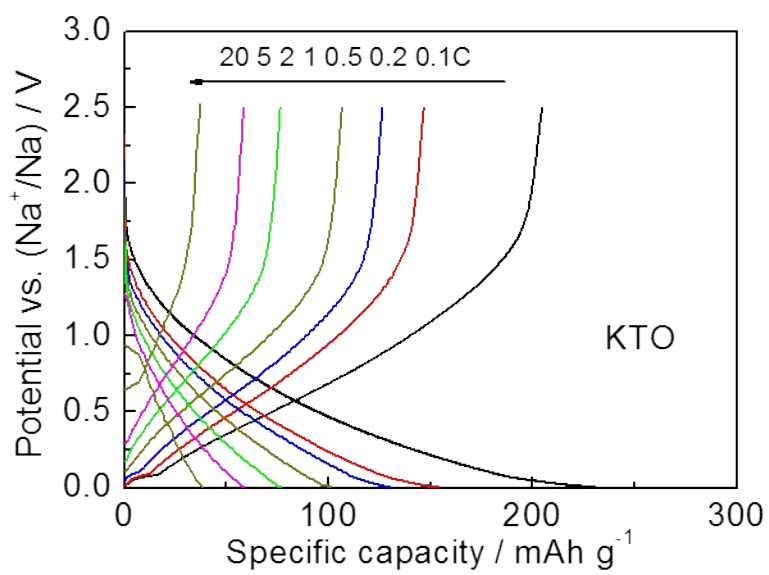

**Fig. S4** Charge and discharge profile of KTO electrode at various C-rates.

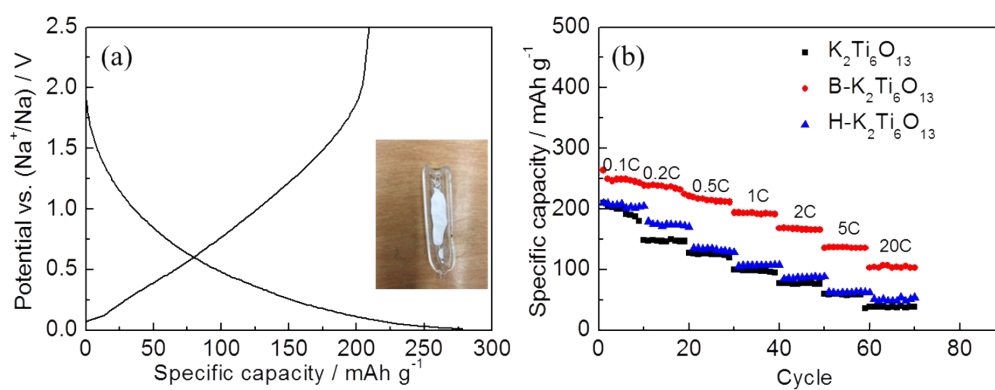

**Fig. S5** (a) Charge and discharge profile of H-KTO electrode, and inset is pictures of H-KTO. (b) Rate capability of KTO, B-KTO and H-KTO.

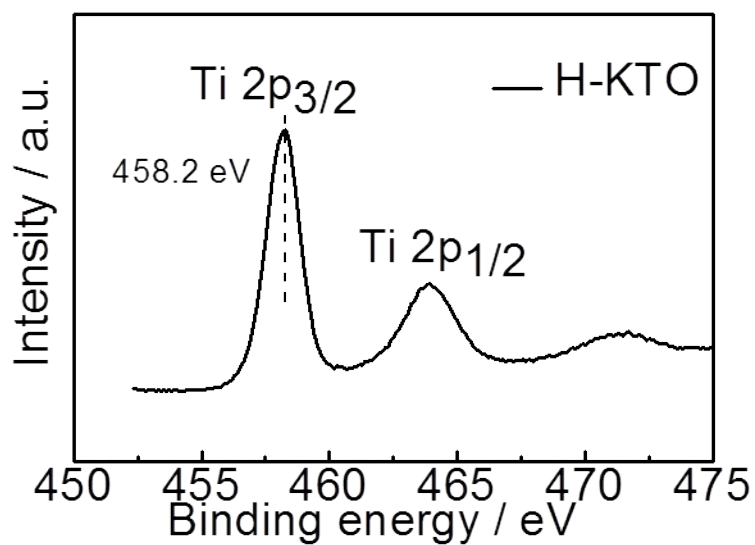

Fig. S6 (a) XPS spectra for KTO and B-KTO samples. Insets are pictures of KTO and B-KTO.

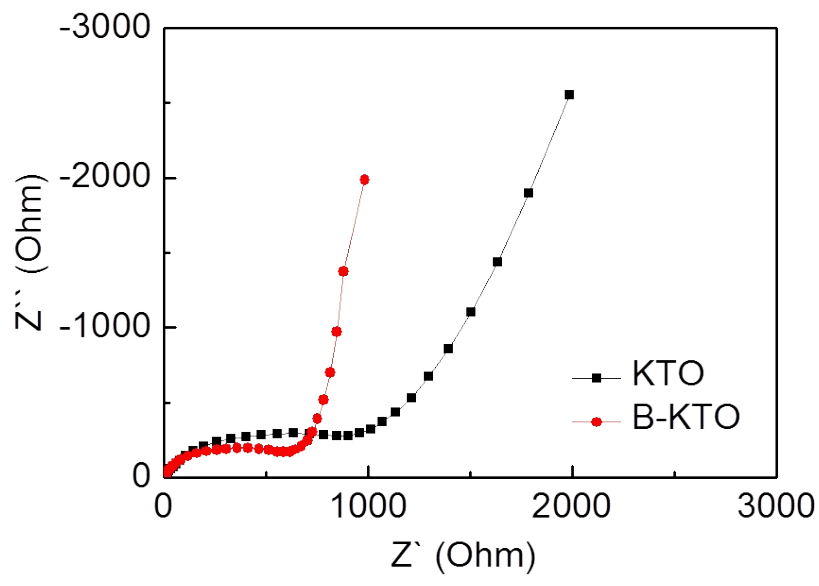

Fig. S7



Table S1 Lattice parameter comparison of  $A_2Ti_6O_{13}$  ( $A = Na, K$ ).<sup>[1]</sup>

| phase            | a (Å)  | b (Å) | c (Å) |
|------------------|--------|-------|-------|
| $Na_2Ti_6O_{13}$ | 15.095 | 3.745 | 9.169 |
| $K_2Ti_6O_{13}$  | 15.597 | 3.797 | 9.110 |

Table S2 High rate capacity comparison of B-KTO nanowires versus reported representative Ti-based anode materials in SIBs.

| Materials                                                                     | Capacity at high rate<br>(mA h g <sup>-1</sup> ) | Publish date | Ref.      |
|-------------------------------------------------------------------------------|--------------------------------------------------|--------------|-----------|
| TiO <sub>2</sub> -graphene                                                    | 111 at 3350 mA g <sup>-1</sup>                   | 2017         | [2]       |
| Li <sub>4</sub> Ti <sub>5</sub> O <sub>12</sub> -graphene                     | 35 at 5050 mA g <sup>-1</sup>                    | 2016         | [3]       |
| Na <sub>2</sub> Ti <sub>3</sub> O <sub>7</sub> -TiO <sub>2</sub> -Sulfidation | 84 at 1770 mA g <sup>-1</sup>                    | 2016         | [4]       |
| Hydrogenated MAX@K <sub>2</sub> Ti <sub>8</sub> O <sub>17</sub>               | 118 at 6000 mA g <sup>-1</sup>                   | 2017         | [5]       |
| TiO <sub>2</sub> -graphene                                                    | 105 at 6000 mA g <sup>-1</sup>                   | 2017         | [6]       |
| Blue TiO <sub>2</sub> (B)                                                     | 90 at 5025 mA g <sup>-1</sup>                    | 2017         | [7]       |
| Carbon coated TiO <sub>2</sub>                                                | 134 at 3350 mA g <sup>-1</sup>                   | 2015         | [8]       |
| Na <sub>2</sub> Ti <sub>3</sub> O <sub>7</sub> @N-doped carbon hollow sphere  | 82 at 5310 mA g <sup>-1</sup>                    | 2016         | [9]       |
| Hydrogenated Na <sub>2</sub> Ti <sub>3</sub> O <sub>7</sub>                   | 77 at 3540 mA g <sup>-1</sup>                    | 2015         | [10]      |
| B-KTO                                                                         | 103 at 4000 mA g <sup>-1</sup>                   |              | This work |

## References

- [1] Q. Zhang, Y. Guo, K. Guo, T. Zhai and H. Li, Ultrafine potassium titanate nanowires: a new Ti-based anode for sodium ion batteries. *Chem. Comm.*, (52) **2016** 6229-6232.
- [2] Z. Le, F. Liu, P. Nie, X. Li, X. Liu, Z. Bian, G. Chen, H. B. Wu and Y. Lu, Pseudocapacitive sodium storage in mesoporous single-crystal-like TiO<sub>2</sub>-graphene nanocomposite enables high-performance sodium-ion capacitors. *ACS Nano*, (11) **2017** 2952-2960.
- [3] C. Chen, H. Xu, T. Zhou, Z. Guo, L. Chen, M. Yan, L. Mai, P. Hu, S. Cheng, Y. Huang and J. Xie, Integrated intercalation-based and interfacial sodium storage in graphene-wrapped porous Li<sub>4</sub>Ti<sub>5</sub>O<sub>12</sub> nanofibers composite aerogel. *Adv. Energy Mater.*, (6) **2016** 1600322.
- [4] J. Ni, S. Fu, C. Wu, Y. Zhao, J. Maier, Y. Yu and L. Li, Superior sodium storage in Na<sub>2</sub>Ti<sub>3</sub>O<sub>7</sub> nanotube arrays through surface engineering. *Adv. Energy Mater.*, (6) **2016** 1502568
- [5] G. Zou, J. Guo, X. Liu, Q. Zhang, G. Huang, C. Fernandez and Q. Peng, Hydrogenated core-shell MAX@K<sub>2</sub>Ti<sub>8</sub>O<sub>17</sub> pseudocapacitance with ultrafast sodium storage and long-term cycling. *Adv. Energy Mater.*, (7) **2017** 1700700.
- [6] C. Chen, Y. W. Wen, X. L. Hu, X. L. Ji, M. Y. Yan, L. Q. Mai, P. P. Hu, B. Shan and Y. H. Huang, Na<sup>+</sup> intercalation pseudocapacitance in graphene-coupled titanium oxide enabling ultra-fast sodium storage and long-term cycling. *Nat. Commun.*, (6) **2015** 6929.

- [7] Y. Zhang, Z. Ding, C. W. Foster, C. E. Banks, X. Qiu and X. Ji, Oxygen vacancies evoked blue TiO<sub>2</sub> (B) nanobelts with efficiency enhancement in sodium storage behaviors. *Adv. Func. Mater.*, (27) **2017** 1700856.
- [8] M. N. Tahir, B. Oschmann, D. Buchholz, X. Dou, I. Lieberwirth, M. Panthöfer, W. Tremel, R. Zentel and S. Passerini, Extraordinary performance of carbon-coated anatase TiO<sub>2</sub> as sodium-ion anode. *Adv. Energy Mater.*, (6) **2015** 1501489.
- [9] F. Xie, L. Zhang, D. Su, M. Jaroniec and S.-Z. Qiao, Na<sub>2</sub>Ti<sub>3</sub>O<sub>7</sub>@N-doped carbon hollow spheres for sodium-ion batteries with excellent rate performance. *Adv. Mater.*, (29) **2017** 1700989.
- [10] S. Fu, J. Ni, Y. Xu, Q. Zhang and L. Li, Hydrogenation driven conductive Na<sub>2</sub>Ti<sub>3</sub>O<sub>7</sub> nanoarrays as robust binder-free anodes for sodium-ion batteries. *Nano Lett.*, (16) **2016** 4544-4551.
